# Supplementary material for: Efficient coding of natural images in the mouse visual cortex
Source: PubMed Central journal article supplement (PMC10951403; doi:10.1038/s41467-024-45919-3), 2024-03-19
Supplement: 41467_2024_45919_MOESM1_ESM.pdf [file 41467_2024_45919_MOESM1_ESM.pdf]

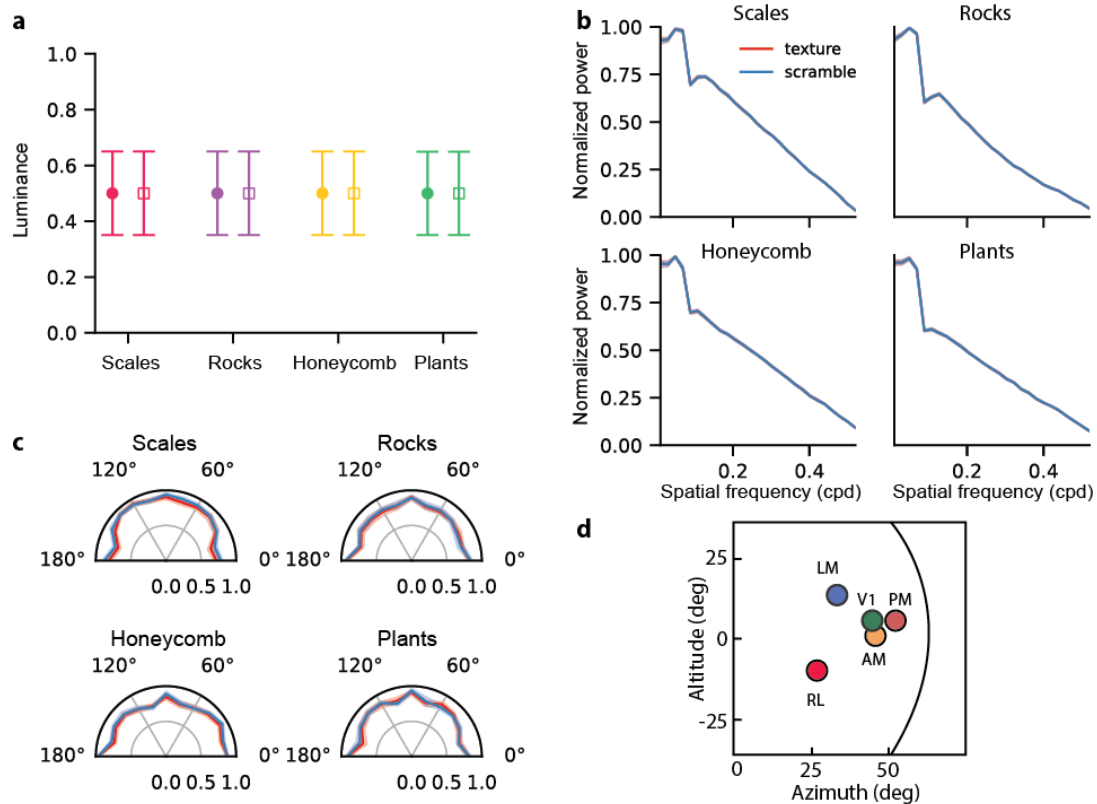

1 Supplementary Figure 1 | Characterization of the lower-order statistics of  
 2 texture and scramble stimuli.

3 **a**, The mean luminance across pixels for all texture exemplars (filled circles) and scramble  
 4 exemplars (open squares) for each family (color code as in the main figures). The error bars  
 5 indicate the RMS contrast—that is, the standard deviation of the pixel intensities averaged  
 6 across all exemplars;  $n = 20$  images per family and stimulus type. **b**, The normalized spatial  
 7 frequency power spectrum for each family—that is, the mean of the spectra computed for  
 8 each exemplar, plotted in a frequency interval of maximum perceptual sensitivity for mice  
 9 (0.02 - 0.5 cpd). **c**, The average orientation power for each texture family computed as the  
 10 mean across exemplars for textures (red) and scrambles (blue). **d**, The mean azimuth and  
 11 elevation of each reliably segmented visual area based on retinotopic mapping (filled dots,  
 12 arbitrary colors; replotted from Garrett et al., J. Neurosci. 2014, Fig. 6E); the semicircle  
 13 delineates the size (fixed across experiments) of the visual stimuli. Source data are provided  
 14 as a Source Data file.

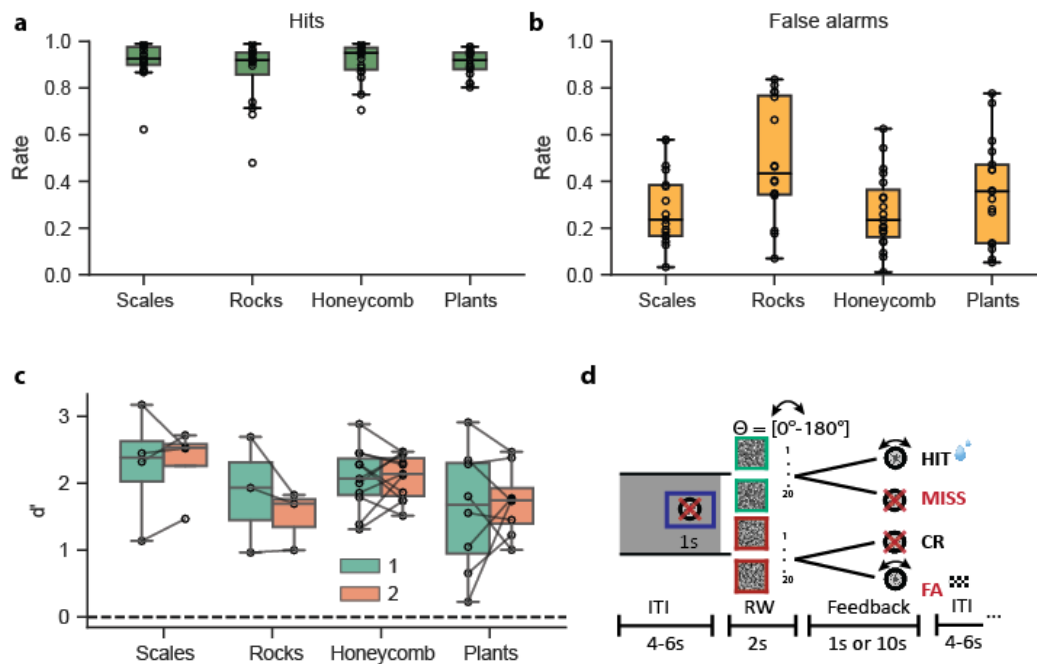

15 Supplementary Figure 2 | Performance of mice in the texture–scramble go/no  
 16 go task.

17 **a**, The average hit rates for each texture family for the mice shown in Fig. 1f; each dot is for  
 18 one animal. Box plots indicate the median with a horizontal bar; the box height denotes the  
 19 inter-quartile range (IQR, 1st and 3rd quartile) and the whiskers extend by 1.5 x IQR. **b**, Same  
 20 as in (a) but for false-alarm rates; boxplots as in (a). **c**, The performance ( $d'$ ) of mice ( $n = 3$ )  
 21 for each texture–scramble pair over the last five sessions prior to a change in the set of 20  
 22 exemplars (green) and over the five sessions after the change (orange). Each dot indicates a  
 23 training session; all differences are not significant; box plots as in (a). **d**, The texture-texture  
 24 go/no-go task: in “go” trials mice need to rotate a rubber wheel with their front paws when  
 25 shown a texture exemplar from a “go” family in order to obtain a water reward. In “no-go” trials,  
 26 mice should refrain from making any wheel rotation when shown texture exemplar from a “no-  
 27 go” family. ITI denotes the inter-trial interval; RW, the response window; and Feedback, the  
 28 feedback period (water reward or high-contrast flickering grating). Each of the texture  
 29 exemplars were randomly rotated between 0 and 180 degrees to prevent mice from solving  
 30 the task using simple orientation cues. Source data are provided as a Source Data file.

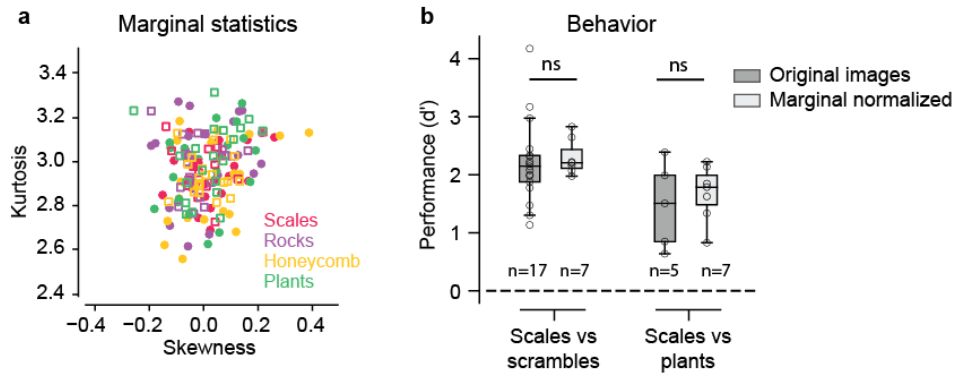

31 Supplementary Figure 3 | Behavioral discriminability with matching skewness  
32 and kurtosis.

33 **a**, For each of the four families, we generated a set of 20 exemplars in which we equalized  
34 pixel-amplitude histograms; images were then scaled and vignetted (Methods). Dots and  
35 squares show the resulting values for skewness and kurtosis (marginal statistics) for  
36 textures and scrambles. **b**, Behavioral discriminability ( $d'$ ) of expert mice in texture-scramble  
37 (scales) and texture-texture (scales – plants) tasks; dark gray boxes when using the original  
38 images, light gray boxes for images with matched marginal statistics. Each dot is for a  
39 mouse; significance was computed using a two-sided unpaired t-test. Box plots indicate the  
40 median with a horizontal bar; the box height denotes the inter-quartile range (IQR, 1st and  
41 3rd quartile) and the whiskers extend by 1.5 x IQR. Source data are provided as a Source  
42 Data file.

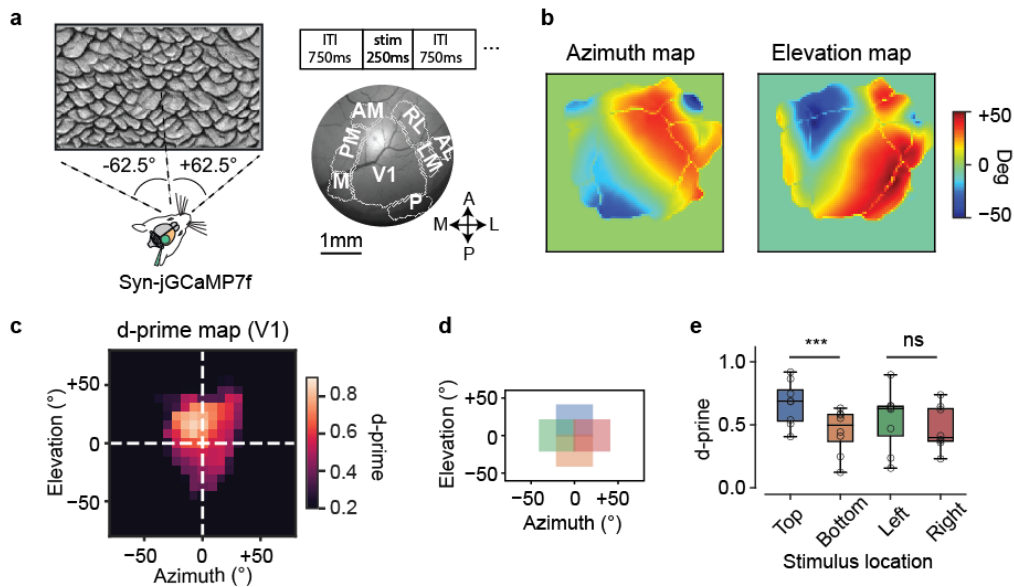

43 Supplementary Figure 4 | Texture discriminability gradient in V1.

44 **a**, Schematic figure of the mouse position during imaging experiments with full-field texture  
 45 stimuli. The mouse was positioned so that its body midline pointed at the right edge of the  
 46 monitor. The monitor had a coverage of 125° in azimuth and 97° in elevation. The visual  
 47 stimuli were shown with the same timing parameters as in the other texture mapping  
 48 experiments (250 ms stimulus on, 750 ms gray screen). Right: example of an unprocessed  
 49 camera frame with segmented visual areas (labels as in Fig. 2a). **b**, Example azimuth and  
 50 elevation sign-maps. **c**, Using the azimuth and elevation maps of each mouse, we measured  
 51 the average  $d'$  values (textures vs scrambles) for each location in the visual space (azimuth,  
 52 elevation) in area V1. The map shown was obtained from the average of  $n = 4$  mice, 2  
 53 sessions per mouse. **d**, To test for the presence of a gradient in texture selectivity, we  
 54 computed average  $d'$  values for each of the four illustrated quadrants (arbitrary colors). **e**,  
 55 Average  $d'$  values for each of the 8 sessions for the upper, lower, right and left visual field.  
 56 The upper visual field was significantly different from the lower visual field ( $p = 5 \times 10^{-4}$ , two-  
 57 sided paired t-test,  $n = 8$ , 4 mice, 2 sessions per mouse). Each dot corresponds to the  
 58 average  $d'$  for a particular mouse and session. Color code as in panel (d). Box plots indicate  
 59 the median with a horizontal bar; the box height denotes the inter-quartile range (IQR, 1st  
 60 and 3rd quartile) and the whiskers extend by 1.5 x IQR. Source data are provided as a Source  
 61 Data file.

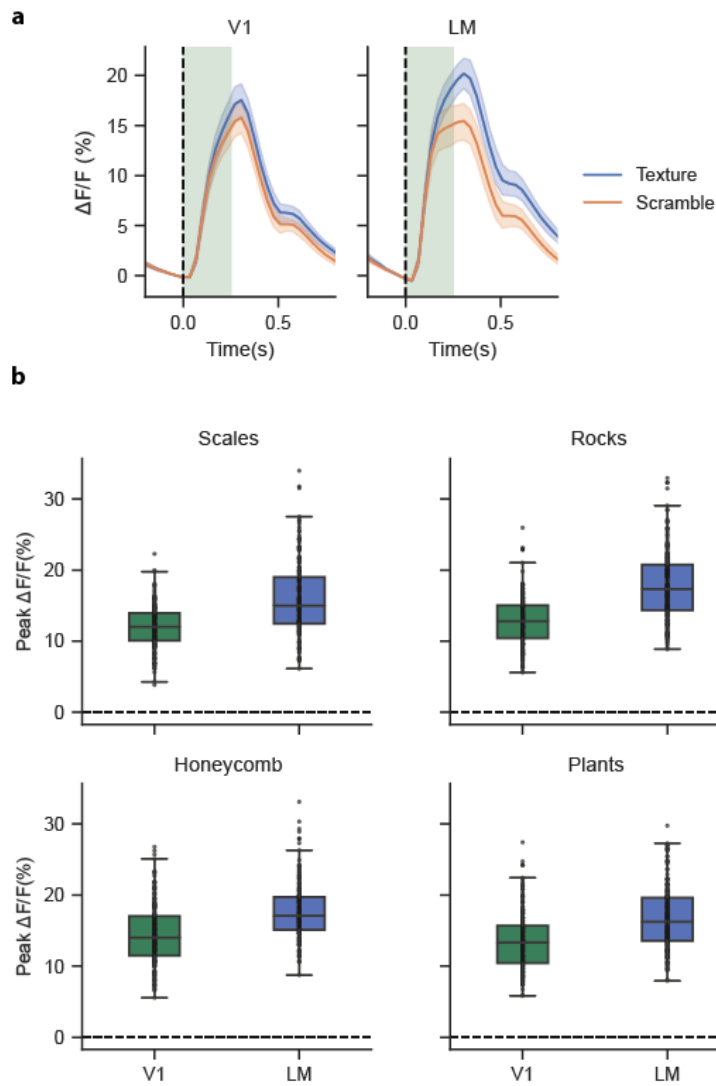

62 Supplementary Figure 5 | Population responses to visual stimuli derived from  
 63 single-cell activity.

64 **a**, The mean population activity of all the visually responsive cells (solid line, average across  
 65 all mice; error bands, 95% confidence intervals across the average response per mouse,  $n =$   
 66 10) as a measure of the collective population response to textures and scrambles for the V1  
 67 and LM experiments. The dotted vertical line indicates the stimulus onset, whereas the  
 68 green band indicates the stimulus duration. The mean population activity was computed as  
 69 the mean response to all the textures and scrambles, averaging across repeats, rotations,  
 70 exemplars, and all the responsive cells. **b**, Population responses were calculated the same  
 71 way as in (a), but the responses were separated across the families (4 plots), and only the  
 72 texture stimuli responses were plotted for both V1 and LM; V1 texture response:  $13.5\% \pm$   
 73  $0.28\%$ , s.e.; LM texture response:  $16.8\% \pm 0.31\%$ , s.e.;  $p < 10^{-6}$  all families, two-sided paired t-  
 74 test Holm-Bonferroni corrected. Box plots indicate the median with a horizontal bar; the box  
 75 height denotes the inter-quartile range (IQR, 1st and 3rd quartile) and the whiskers extend by  
 76  $1.5 \times$  IQR. Source data are provided as a Source Data file.

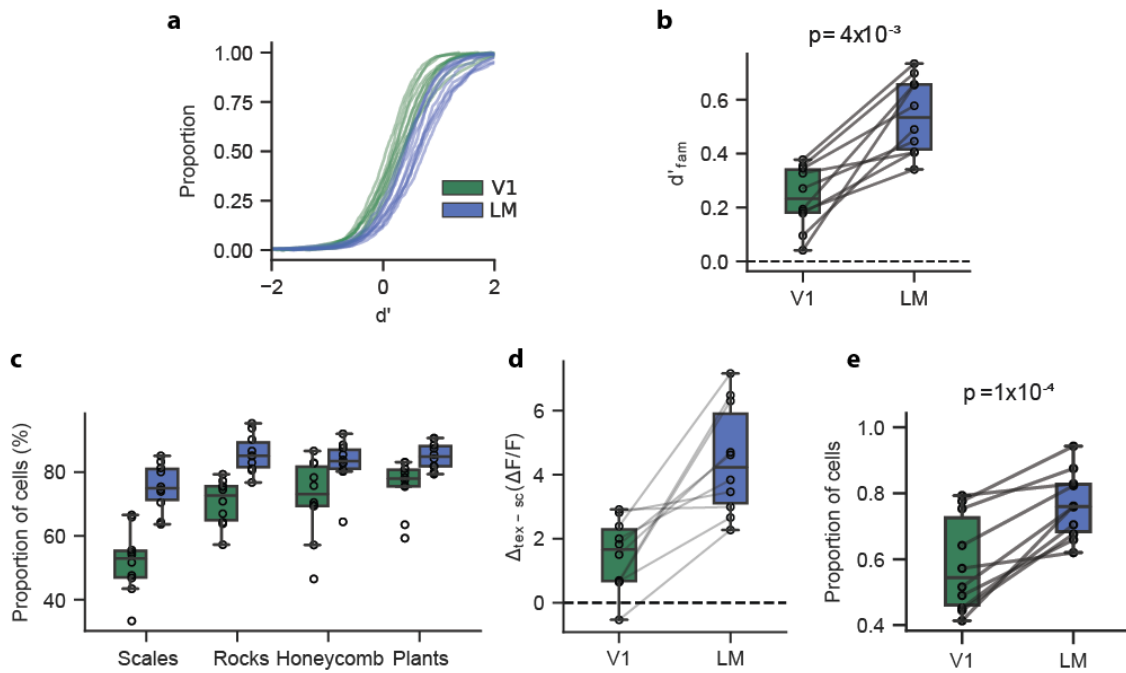

77 **Supplementary Figure 6 | Single-cell responses to textures and scrambles.**  
 78 **a**, Cumulative distributions of the neural discriminability values ( $d'$ ) of cells (combining  
 79 across experiments and averaging across texture families) in the discrimination of textures  
 80 vs scrambles images; green for V1 and blue for LM. Each line is for one animal. **b**, Average  $d'$   
 81 values for the discriminability between texture and scrambles combined across all families  
 82 (each animal is a black dot; mean across cells and texture–scramble pairs) for V1 and LM;  
 83 the p-value from a two-sided paired t-test across mice ( $n = 10$ ); box plots indicate the median  
 84 with a horizontal bar; the box height denotes the inter-quartile range (IQR, 1st and 3rd  
 85 quartile) and the whiskers extend by  $1.5 \times$  IQR. **c**, The proportion of cells with a  $d' > 0$  is  
 86 higher in LM than in V1 for each mouse (black dots) across all the texture–scramble pairs.  
 87 P-values for each family: scales =  $7.4 \times 10^{-5}$ , rocks =  $8.8 \times 10^{-4}$ , honeycomb = 0.024, plants =  
 88 0.006, paired t-test. Proportions across families: V1:  $67.5\% \pm 1.8\%$  s.e., LM:  $82.2\% \pm 1.4\%$  s.e.  
 89 Box plots as in (b). **d**, Average modulation difference for each animal (black dots,  $n = 10$   
 90 mice, mean across all cells, exemplars, and families) for V1 and LM; V1 texture – scramble  
 91 difference:  $1.5\% \pm 0.25$ , LM:  $3.5\% \pm 0.39$ ,  $p = 0.002$ , two-sided paired t-test,  $n = 10$ . Box plots  
 92 as in (b). **e**, Proportion of cells for each mouse (black dots) for which the regressive model  
 93 based on the PS statistics had an explained variance  $EV \geq 1\%$ , separately for V1 and LM. The  
 94 connecting lines are for the same animal; p-value, two-sided paired t-test; box plots as in (b).  
 95 Source data are provided as a Source Data file.

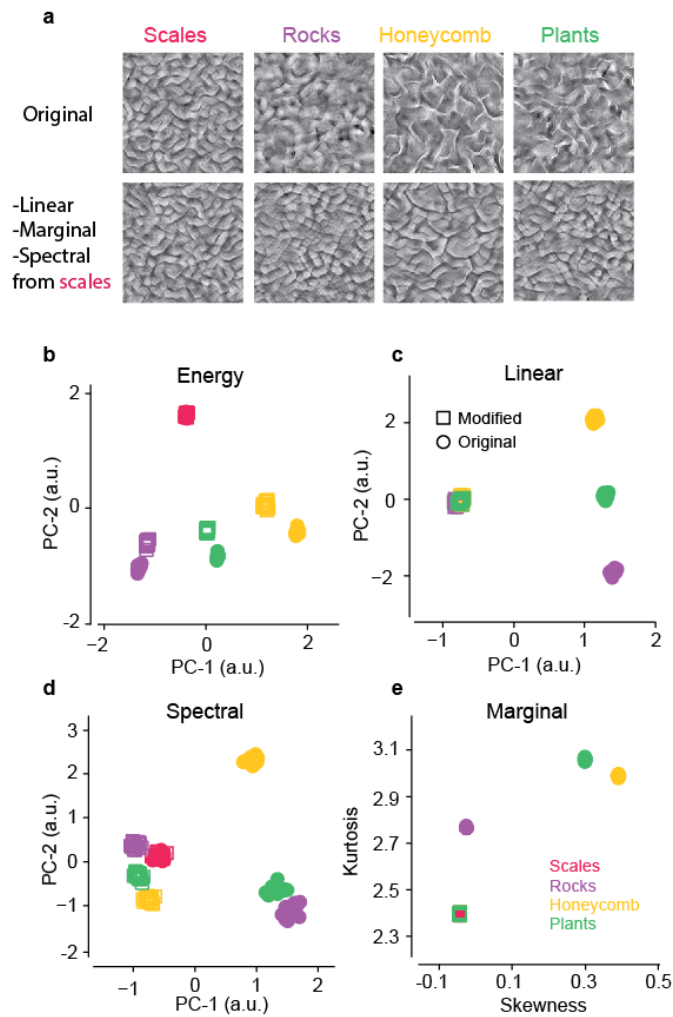

96 Supplementary Figure 7 | Synthesis of textures with equal linear, marginal, and  
 97 spectral PS statistics.

98 **a**, Top row: textures synthesized using the Portilla-Simoncelli algorithm for four texture  
 99 families. Bottom row: Textures synthesized using the same algorithm as in the top row, but  
 100 the linear, marginal, and spectral statistics were constrained to be those of the scales family.  
 101 Instead, the energy statistics were the original statistics of each of the four texture families.  
 102 **b-e**, Two-dimensional PCA embedding of each of the four groups of image statistics (titles)  
 103 for both the images synthesized with the original PS statistics (open dots) and the images  
 104 whose linear, marginal and spectral statistics come from the scales family (open squares).  
 105 Color code for texture families in the legend. Source data are provided as a Source Data file.

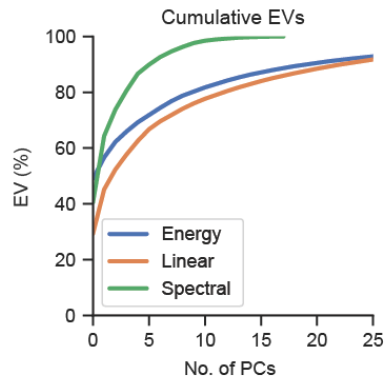

106 Supplementary Figure 8 | PCA decomposition of PS statistics.

107 PCA was used to reduce redundancies in the PS decomposition of the images. This panel  
108 shows the cumulative explained variance of the reduced PS statistics for the spectral, linear  
109 cross-correlation, and energy cross-correlation statistics. Source data are provided as a  
110 Source Data file.



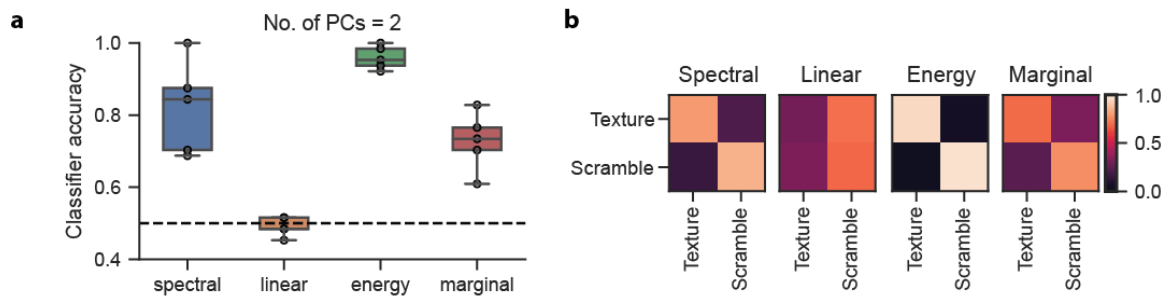

Supplementary Figure 9 | Texture vs scramble classifiers across a subset of PS image statistics.

111 **a**, Cross-validated performance of a binary linear classifier trained to discriminate between  
 112 texture and scramble images (across all families and exemplars) based on different PS  
 113 statistical groups (x-labels). The horizontal dotted line indicates chance-level accuracy. The  
 114 energy cross-correlation statistics is the group of image statistics with the highest  
 115 discriminability accuracy in a 2D-PCA embedding space; n = 5 classifiers from a 5-fold cross  
 116 validated procedure. Box plots indicate the median with a horizontal bar; the box height  
 117 denotes the inter-quartile range (IQR, 1st and 3rd quartile) and the whiskers extend by 1.5 x  
 118 IQR. **b**, Confusion matrix for the texture-scramble classifiers is shown in (a) for each PS  
 119 statistical group (titles). Source data are provided as a Source Data file.

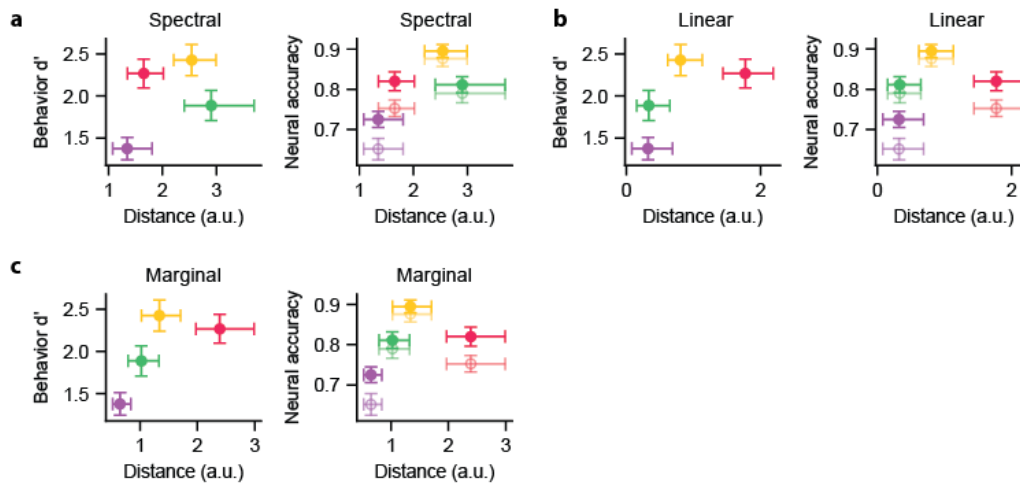

120 Supplementary Figure 10 | Neural, behavioral, and statistical distance  
 121 measures for spectral, linear and marginal PS statistics.

122 **a-c**, Each panel illustrates the same concept as in Figure 4, that is, the relationship between  
 123 neural accuracy, behavioral performance, and image statistics, but for the other three groups  
 124 of PS image statistics: spectral, linear cross-correlation, and marginal statistics. The error  
 125 bars for behavioral performance and classification accuracy are the standard error of the  
 126 mean; the error bars for inter-cluster distances are the 99.7% confidence intervals with  
 127 Šidák correction for multiple comparisons. Data points: behavior axis,  $n = 16$  animals; neural  
 128 accuracy axis,  $n = 10$  mice (10 classifiers); distance axis,  $n = 1000$  (bootstrap samples). Filled  
 129 dots indicate: behavior axis, mean performance across all 16 mice; accuracy axis: mean  
 130 classifier accuracy across all 10 mice; distance axis: mean of the bootstrapped distribution  
 131 (1000 samples). Source data are provided as a Source Data file.

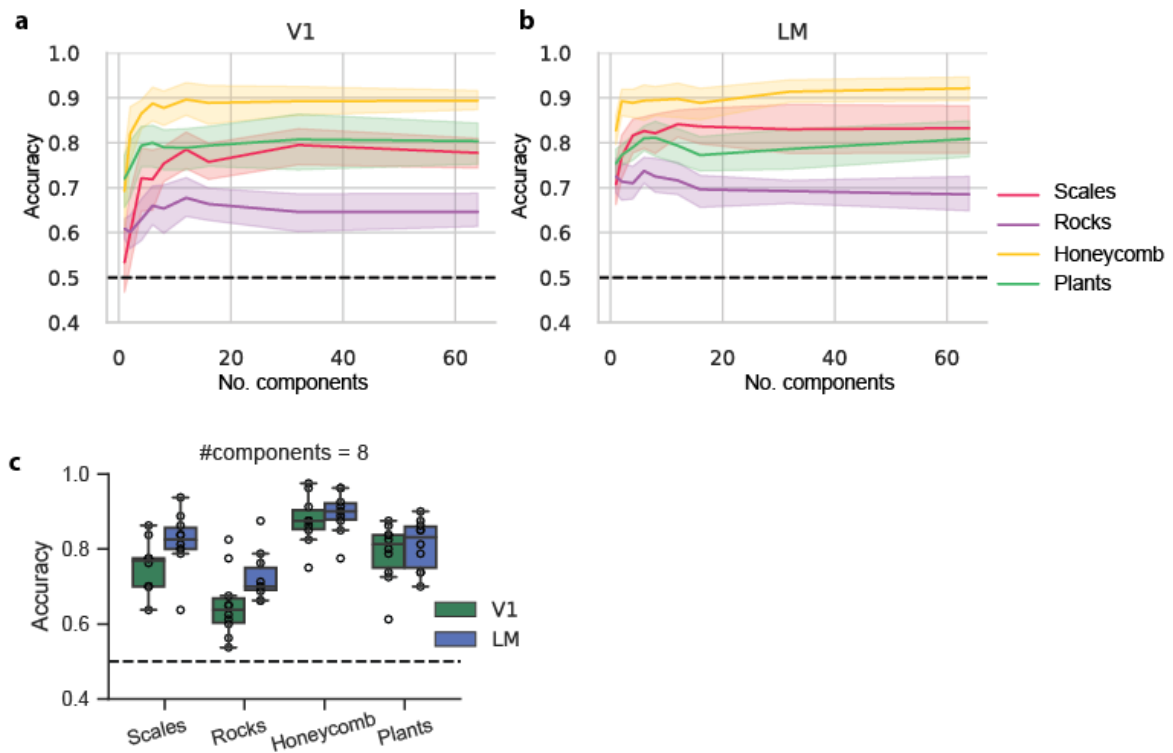

Supplementary Figure 11 | Binary classifiers of neural data for texture–scramble discrimination in V1 and LM.

132 **a**, The accuracy (fractional values) of a binary classifier trained on different pairs of texture–  
 133 scramble families (legend in panel (b)) as a function of the number of components in the  
 134 neural PCA space for V1. The shaded regions correspond to the 95% confidence interval for  
 135 the average classification accuracy of all mice ( $n = 10$ ). **b**, Same as in (a) but for LM. Fewer  
 136 principal components (PCs) are needed in LM than in V1 to attain maximum performance:  
 137 V1 accuracy, 12 dimensions:  $78.6\% \pm 1.6\%$  s.e.; LM accuracy, four dimensions:  $78.6\% \pm 1.5\%$ ;  
 138  $p < 0.05$  for mean accuracy of V1, 1-12 dimensions, vs LM, four dimensions, one-sided  
 139 paired t-test,  $n = 10$ . **c**, The accuracy of the same binary classifier in (a, b) when using eight  
 140 PCA components. One-sided one sample t-test relative to 50% accuracy: V1, scales  $p = 1 \times$   
 141  $10^{-6}$ ; rocks  $p = 5 \times 10^{-4}$ ; honeycomb  $p = 2 \times 10^{-8}$ ; plants  $p = 1 \times 10^{-6}$ . LM: scales  $p = 4 \times 10^{-7}$ ;  
 142 rocks  $p = 2 \times 10^{-6}$ ; honeycomb  $p = 3 \times 10^{-9}$ ; plants  $p = 2 \times 10^{-7}$ . Source data are provided as a  
 143 Source Data file.

### Supplementary Table 1

144 Summary of the number of trials in a texture/scramble behavioral task

| <b>Mouse ID</b> | <b>Scales</b> | <b>Rocks</b> | <b>Honeycomb</b> | <b>Plants</b> |
|-----------------|---------------|--------------|------------------|---------------|
| 20070           | 2189          | n/a          | 1021             | 2029          |
| 20099           | 2015          | 1715         | 1122             | 2003          |
| 20100           | 2024          | 1979         | 1032             | 1677          |
| 20109           | 1853          | 1581         | 1000             | 1651          |
| 20117           | 1925          | 1938         | 1029             | 2213          |
| 21030           | 1471          | 1396         | 748              | 1682          |
| 21031           | 1816          | 1787         | 1056             | 1936          |
| 21032           | n/a           | n/a          | 1044             | n/a           |
| 21033           | 1857          | 1560         | 1018             | 1856          |
| 21047           | 1839          | 1651         | 1985             | 756           |
| 21048           | 1002          | 1616         | 1852             | 1979          |
| 21049           | n/a           | n/a          | 871              | n/a           |
| 21051           | 2059          | 1833         | 2049             | 870           |
| 21055           | 1666          | 1945         | 2059             | 864           |
| 21056           | 3712          | 1937         | 981              | 2040          |
| 21060           | 3845          | 2195         | 1118             | 2208          |
| 21061           | 1078          | 1892         | 2075             | 2172          |
| 21062           | 2042          | 2055         | 1962             | 1101          |
| 21064           | 3265          | 2332         | 2344             | 2260          |

### Supplementary Table 2

145 Summary of the number of trials in a texture/texture behavioral task

| <b>Mouse ID</b> | <b>Honeycomb rocks</b> | <b>Honeycomb plants</b> | <b>Scales plants</b> | <b>Rocks plants</b> | <b>Honeycomb scales</b> | <b>Rocks scales</b> |
|-----------------|------------------------|-------------------------|----------------------|---------------------|-------------------------|---------------------|
| 20100           | 2097                   | 2046                    | 1587                 | n/a                 | n/a                     | n/a                 |
| 20117           | n/a                    | 1637                    | n/a                  | 1618                | 1583                    | n/a                 |
| 21030           | n/a                    | n/a                     | 1971                 | 2060                | 2038                    | 2087                |
| 21031           | n/a                    | 1615                    | 1918                 | 2162                | 2144                    | 1956                |
| 21033           | 1916                   | n/a                     | 1775                 | n/a                 | n/a                     | 2206                |
| 21047           | n/a                    | n/a                     | n/a                  | n/a                 | n/a                     | 1992                |
| 21048           | 1669                   | n/a                     | n/a                  | n/a                 | 1786                    | n/a                 |
| 21049           | 1890                   | n/a                     | 2008                 | 3727                | n/a                     | n/a                 |
| 21051           | n/a                    | n/a                     | n/a                  | n/a                 | 2091                    | n/a                 |
| 21055           | 1676                   | n/a                     | n/a                  | n/a                 | 1705                    | n/a                 |
| 21056           | 1960                   | 2022                    | n/a                  | n/a                 | n/a                     | n/a                 |
| 21060           | 1802                   | 1940                    | n/a                  | n/a                 | n/a                     | n/a                 |
| 21062           | n/a                    | n/a                     | n/a                  | n/a                 | n/a                     | 1963                |
| 21064           | n/a                    | n/a                     | n/a                  | n/a                 | n/a                     | 2123                |
| 21067           | 1797                   | n/a                     | n/a                  | 1619                | 1813                    | n/a                 |
| 21074           | 2138                   | n/a                     | n/a                  | n/a                 | n/a                     | n/a                 |
